# Supplementary material
Source: PubMed Central journal article supplement (PMC3329933)
Supplement: NIHMS369550-supplement-supplement_1.pdf [file NIHMS369550-supplement-supplement_1.pdf]

## ONLINE METHODS

**Human subjects.** The study protocol was approved by the Yale Human Investigation Committee (HIC) (protocol number 0908005592). Institutional review board approvals for genetic and MRI studies, along with written consent from all study subjects, were obtained by the referring physicians at the participating institutions. All fetal human tissues were collected under guidelines approved by the Yale HIC (protocol number 0605001466). Human fetal brains at 20 and 22 weeks of gestation were obtained from the Human Fetal Tissue Repository at the Albert Einstein College of Medicine (CCI number 1993-042).

**Genome-wide genotyping.** The Illumina Platform was used for genome-wide genotyping and analysis of the samples. Human 610K Quad BeadChips were used according to the manufacturer's protocol (Illumina).

**Exome capture and sequencing.** NimbleGen 2.1M human exome array version 1.0 (Roche Nimblegen, Inc.) was used to capture the exomes of samples NG 49-1 and NG 50-1 according to the manufacturer's protocol, with modifications<sup>11,27</sup>. Sequencing of the library was performed on Genome Analyzer IIx using a single lane per subject (at a read length of 99 bp and 74 bp for NG 49-1 and NG 50-1, respectively) (Supplementary Table 2). The Illumina pipeline version 1.5 was used for image analysis and base calling.

**Exome data analysis.** Analysis of the sequencing data was performed according to the previously described data analysis pipeline we have developed<sup>11,27</sup> by mapping the reads to the human genome (NCBI36/hg18) by Maq and BWA software<sup>28,29</sup>. Coverage rates and distributions, as well as error positions and frequencies, were detected using perl scripts developed in house. Variants were called using SAMtools<sup>30</sup> and annotated for newness as compared to the dbSNP, Personal Genome and 1000 Genomes databases, as well as additional exome sequencing experiments we have performed. New variants were further evaluated for their impact on the encoded protein, conservation across 44 vertebrate species and *Caenorhabditis elegans* and *Drosophila melanogaster*, expression patterns and potential overlap with known miRNAs.

**Sanger sequencing.** Coding regions and exon-intron boundaries of *LAMC3* were evaluated by Sanger sequencing using standard protocols. Amplicons were cycle sequenced on ABI 9800 Fast Thermocyclers, and post cycle sequencing clean up was carried out with CleanSEQ System (Beckman Coulter Genomics). The amplicons were analyzed on 3730xL DNA Analyzer (Applied Biosystems Inc.).

**Animals.** All protocols performed in animal experiments were approved by the Institutional Animal Care and Use Committee at Yale School of Medicine. Embryonic day 0.5 was determined as the midday of the day of vaginal plug discovery. For embryonic stages, pregnant females were anesthetized, pups at appropriate stages were extracted from the uterus and the brains were dissected and fixed overnight by immersion in 4% paraformaldehyde in phosphate-buffered saline. Mouse brains were then cryoprotected in 30% sucrose in 4% paraformaldehyde and sectioned in the coronal plane on a Leica sledge cryomicrotome at 40  $\mu$ m (Leica Microsystems). Sections were mounted on slides and processed with *in situ* hybridization.

**In situ hybridization.** Sections were processed for non-radioactive *in situ* hybridization as described previously with minor modifications<sup>31,32</sup>.

**Immunofluorescence.** Upon dissection, fetal human brains were immersed whole in 4% paraformaldehyde for 36 h, cryoprotected and frozen, and cryosectioned at 60  $\mu$ m. Standard techniques were used after primary antibodies were diluted in blocking solution containing normal donkey serum as follows: rabbit anti-*LAMC3* (R96, W. Brunken, SUNY Downstate), 1:5,000; goat anti-SOX2 (Santa Cruz), 1:250; mouse anti-NeuN (Millipore), 1:1,000; mouse anti-SMI-312 (Covance), 1:250; mouse anti-MAP2 (Sigma), 1:1,000; and mouse anti-SRGA1 (Abcam), 1:250.

***LAMC3* expression.** The data were from a unique, high-quality microarray dataset that measured gene expression within different brain regions throughout human life using the Affymetrix Human Exon 1.0 ST arrays<sup>15</sup> (see URLs).

The log<sub>2</sub>-transformed expression values were calculated. The heat map was plotted by averaging the expression of *LAMC3* (*Laminin  $\gamma$ 3*) in the samples from the same cortical area and stage (Fig. 4a). The following cortical areas were sampled: orbital prefrontal cortex (OFC), dorsolateral prefrontal cortex (DFC), ventrolateral prefrontal cortex (VFC), medial prefrontal cortex (MFC), primary motor (M1) cortex (M1C), primary somatosensory (S1) cortex (S1C), posterior inferior parietal cortex (IPC), primary auditory (A1) cortex (A1C), posterior superior temporal cortex (STC), inferior temporal cortex (ITC) and primary visual (V1) cortex (V1C) (Fig. 4a).

To compare the relationship of *LAMC3* expression levels and developmental trajectories, functional gene lists for dendrite development (*MAP1A*, *MAPT* and *CAMK2A*) (Fig. 4e) and synaptogenesis (*SYP*, *SYPL1*, *SYPL2* and *SYN1*) (Supplementary Fig. 8) were manually curated. To summarize the principle gene expression profile of each category, principal component analysis was performed. The first principle component (PC1), which accounts for the majority of variability in the data, was plotted against age (to represent the developmental trajectory) and *LAMC3* expression level. The two independent datasets of synaptic density and the number of basal dendrites in the corresponding brain regions or areas were scaled by  $\frac{x-\mu}{\sigma}$ , in which  $\mu$  and  $\sigma$  are the mean and the standard deviation of the values, respectively, corresponding to the time periods for which both our gene expression and the independently generated data were available. The scaled values were plotted against logarithmic age in days, and a cubic spline curve was fitted to display the developmental trajectories. The predicted values on this curve were calculated corresponding to available time points of previously generated independent data on dendrite development<sup>16,17</sup> and synaptogenesis<sup>18</sup>. To identify developmentally co-expressed genes, we calculated the correlation of the temporal expression pattern of all other genes to that of *LAMC3*. The top 50 genes were selected for functional annotation, using DAVID Bioinformatics Resources 6.7 (see URLs)<sup>33</sup>.

**Primary human neuronal cell culture.** All experiments were conducted in accordance with a protocol approved by the Yale Human Investigation Committee (principal investigator, N. Šestan, Protocol# 0605001466). Ventricular zone tissue was dissected from fetal human frontoparietal neocortical wall at 19 weeks of gestation, enzymatically dissociated and cultured in serum-free media in the presence of FGF-2 (20 ng/ml) and epidermal growth factor (20 ng/ml). After 4 weeks in culture, neural progenitor cells were transfected with a construct that co-expresses GFP and hemagglutinin (HA)-tagged human *LAMC3* (BC156274) using nucleofection (Lonza, kit VPG-1004; program A-033). One day after transfection, growth factors were withdrawn to facilitate neuronal differentiation. After 7 days in culture in the absence of growth factors, differentiated neurons were fixed and stained for GFP and HA.

**MR data acquisition.** MRI scanning was performed on a 3 Tesla scanner (Magnetom Trio, Siemens AG) with a twelve-channel phase-array head coil. A high-resolution T1-weighted three-dimensional anatomical-volume scan was acquired for each participant in the same session before the functional and DTI scans. BOLD signals in the functional scans were measured with an echo-planar imaging sequence. DTI data were acquired using a single-shot spin-echo echo-planar imaging sequence with parallel imaging technique GRAPPA.

**MRI structural analysis procedures.** Structural analysis involved three-dimensional reconstruction of the participants' cortices and computing cortical thickness using the Freesurfer analysis package (see URLs). After correction, the cortical thickness was calculated at each point as the shortest distance between the white matter-gray matter boundary and the gray matter-cerebrospinal fluid boundary. Finally, the cortical thickness measurement results were mapped on the three-dimensional model of the cortex using a color coding scheme for visualization.

**Retinotopic mapping procedures.** Experimental software for the retinotopic mapping fMRI scan was written by H.B. and K.D. in the Java programming platform (see URLs). In the scanner, the stimuli were back projected by a video projector fitted with a long throw lens onto a translucent back projection screen placed inside the scanner bore with the help of an angled first surface mirror. The functional scans were performed for retinotopic mapping following the methods developed by two previous studies<sup>34,12</sup>.

Functional images were preprocessed by using the BrainVoyager QX software (Brain Innovation BI) and the three-dimensional model of the cortices were constructed and inflated for visualization. Functional images from all scans were spatially transformed and aligned with the anatomical volume obtained in the retinotopic mapping scan individually. Boundaries between retinotopic areas were drawn manually with a standard graphics program (Inkscape) after visual inspection of the cross-correlation maps of the BOLD response and the rotating wedges and of the BOLD response and the expanding annuli<sup>12,34</sup>. The analysis of the second scan of NG 367-1 involved the same steps, except that instead of a cross-correlation analysis, we performed a general linear model analysis to identify the voxels that respond to vertical or horizontal wedges. We then visualized these voxels on the inflated cortex and used this as auxiliary information for manually drawing the boundaries between early visual areas.

**DTI analysis procedures.** White matter pathways were identified using the MRI Atlas of Human White Matter<sup>35</sup> and fiber tracking was performed in MedINRIA software package (see URLs). Fractional Anisotropy and Mean Diffusivity maps were computed in DTI studio<sup>36</sup> in three manually defined region of interest. Initial measurements are reported, and no further statistical analysis was performed.

27. Choi, M. *et al.* Genetic diagnosis by whole exome capture and massively parallel DNA sequencing. *Proc. Natl. Acad. Sci. USA* **106**, 19096–19101 (2009).
28. Li, H. & Durbin, R. Fast and accurate short read alignment with Burrows-Wheeler transform. *Bioinformatics* **25**, 1754–1760 (2009).
29. Li, H., Ruan, J. & Durbin, R. Mapping short DNA sequencing reads and calling variants using mapping quality scores. *Genome Res.* **18**, 1851–1858 (2008).
30. Li, H. *et al.* The Sequence Alignment/Map format and SAMtools. *Bioinformatics* **25**, 2078–2079 (2009).
31. Louvi, A., Sisodia, S.S. & Grove, E.A. Presenilin 1 in migration and morphogenesis in the central nervous system. *Development* **131**, 3093–3105 (2004).
32. Stillman, A.A. *et al.* Developmentally regulated and evolutionarily conserved expression of SLITRK1 in brain circuits implicated in Tourette syndrome. *J. Comp. Neurol.* **513**, 21–37 (2009).
33. Dennis, G. Jr. *et al.* DAVID: Database for Annotation, Visualization, and Integrated Discovery. *Genome Biol.* **4**, P3 (2003).
34. Engel, S.A., Glover, G.H. & Wandell, B.A. Retinotopic organization in human visual cortex and the spatial precision of functional MRI. *Cereb. Cortex* **7**, 181–192 (1997).
35. Song, S.K. *et al.* Demyelination revealed through MRI as increased radial (but unchanged axial) diffusion of water. *Neuroimage* **17**, 1429–1436 (2002).
36. Jiang, H., van Zijl, P.C., Kim, J., Pearlson, G.D. & Mori, S. DtiStudio: resource program for diffusion tensor computation and fiber bundle tracking. *Comput. Methods Programs Biomed.* **81**, 106–116 (2006).

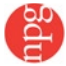

# Supplementary Material

for

## Recessive *LAMC3* mutations cause malformations of occipital cortical development

Tanyeri Barak<sup>1,2,3,#</sup>, Kenneth Y. Kwan<sup>2,4,#</sup>, Angeliki Louvi<sup>1,2</sup>, Veysi Demirbilek<sup>5</sup>, Serap Saygi<sup>6</sup>, Beyhan Tüysüz<sup>7</sup>, Murim Choi<sup>3</sup>, Hüseyin Boyacı<sup>8,9</sup>, Katja Doerschner<sup>8,9</sup>, Ying Zhu<sup>2,4</sup>, Hande Kaymakçalan<sup>10</sup>, Saliha Yılmaz<sup>1,2,3</sup>, Mehmet Bakırcıoğlu<sup>1,2,3</sup>, Ahmet Okay Çağlayan<sup>1,2,3</sup>, Ali Kemal Öztürk<sup>1,2,3</sup>, Katsuhito Yasuno<sup>1,2,3</sup>, William J. Brunken<sup>11,12</sup>, Ergin Atalar<sup>9</sup>, Cengiz Yalçınkaya<sup>5</sup>, Alp Dinçer<sup>13</sup>, Richard A. Bronen<sup>1,14</sup>, Shrikant Mane<sup>3,15</sup>, Tayfun Özçelik<sup>16</sup>, Richard P. Lifton<sup>3,17</sup>, Nenad Šestan<sup>2,4</sup>, Kaya Bilgüvar<sup>1,2,3</sup>, & Murat Günel<sup>1,2,3,\*</sup>

Departments of <sup>1</sup>Neurosurgery, <sup>2</sup>Neurobiology and <sup>3</sup>Genetics, Center for Human Genetics and Genomics and Program on Neurogenetics, Yale School of Medicine, New Haven CT, 06510, USA

<sup>4</sup>Kavli Institute for Neuroscience, Yale School of Medicine, New Haven, CT, 06510, USA

<sup>5</sup>Division of Child Neurology, Department of Neurology, Istanbul University Cerrahpasa Faculty of Medicine, Istanbul, 34098, Turkey

<sup>6</sup>Department of Neurology, Hacettepe University School of Medicine, Ankara, 06100, Turkey

<sup>7</sup>Division of Genetics, Department of Pediatrics, Istanbul University Cerrahpasa Faculty of Medicine, Istanbul, 34098, Turkey

<sup>8</sup>Department of Psychology and <sup>9</sup>National Magnetic Resonance Research Center, Bilkent University, Ankara, 06800 Turkey

<sup>10</sup>Faculty of Arts and Sciences, Bahcesehir University, Istanbul, 34353, Turkey

Departments of <sup>11</sup>Cell Biology and <sup>12</sup>Ophthalmology, SUNY Downstate Medical Center, Brooklyn, NY 11203

<sup>13</sup>Department of Radiology, Acibadem University School of Medicine, Istanbul, 34742, Turkey

<sup>14</sup>Department of Radiology, Yale School of Medicine, New Haven CT, 06510, USA

<sup>15</sup>Yale Center for Genome Analysis, Yale School of Medicine, New Haven, Connecticut 06510, USA

<sup>16</sup>Department of Molecular Biology and Genetics, Faculty of Science, Bilkent University, Ankara, 06800 Turkey

<sup>17</sup>Howard Hughes Medical Institute, Yale School of Medicine, New Haven, CT, 06510, USA

# These authors contributed equally to the study

\* To whom correspondence should be addressed (murat.gunel@yale.edu)

## Supplementary Note

### Functional MRI (fMRI)

Retinotopic mapping using fMRI indicated that the relative locations and functions of the primary visual areas in individual NG367-1 were largely indistinguishable from control subjects (**Fig. 2d** and **Supplementary Fig. 3b**). Specifically, in each hemisphere the foveal representation was mapped to the vicinity of the occipital pole; the primary visual cortex (striate cortex, V1) represented the full contralateral hemi-visual field and was flanked by dorsal and ventral parts of extrastriate visual areas (V2 and V3), with the former representing the lower quadrants of the visual contralateral hemifield and the latter corresponding to the upper quadrants.

**Tractography** results revealed the disorganization of short association fibers in the posterior part of the occipital lobe (**Fig. 2e**). We investigated white matter integrity in the pachygyric region by computing average fractional anisotropy (FA), mean diffusivity (MD) and radial diffusivity (RD) in manually defined regions of interest (ROIs) in the patient and two controls. We found markedly lower FA and elevated RD values in the patient in an ROI adjacent to the pachygyric region (patient: FA=0.32, sd=0.04, RD=6.88e-004 sd=2.6e-005; controls: FA=0.56, sd=0.04, RD=4.55e-004 sd=1.9e-005). Differences in mean diffusivity were not pronounced (patient: MD=8.4e-004, sd=4.1e-005, controls: MD=7e-004, sd=5.8e-005). These numbers suggest microstructural changes of white matter in the pachygyric region, possibly due to disorganization of fibers<sup>1,2</sup>. No marked changes in FA, MD, or RD values were observed in the anterior or posterior parts of the inferior fronto-occipital pathway.

### Co-expression profile of LAMC3 in human cortical development

To gain insight into the function of LAMC3 during human brain development, we analyzed functional annotations (false discovery rate (FDR) < 0.01) of the top 50 most highly co-expressed genes in the

Human Brain Transcriptome database ([www.humanbraintranscriptome.org](http://www.humanbraintranscriptome.org)). We identified that the temporal and spatial expression pattern of several extracellular molecules, along with a known receptor for *LAMC3*, *nidogen 2*<sup>3</sup>, paralleled that of *LAMC3* (FDR =  $4.0 \times 10^{-10}$ ) (**Supplementary Table 7**). The importance of the extracellular matrix has previously been shown not only for accurate structural organization but also for proper functioning of the cortex. For example, Reelin, an extracellular matrix protein that plays a fundamental role in neuronal cell migration during development is also important in cortical organization, including dendritogenesis and the formation of axonal projections, in the postnatal period<sup>4,5</sup>. Our results suggest that *LAMC3* may function in occipital cortex development and organization in a similar manner.

## **Clinical Histories of Patients**

### **NG 49-1**

The patient is a 14 year-old left-handed girl born to a consanguineous union. She weighed 3 kg at birth (50<sup>th</sup> percentile), and no quantitative data is available for height and head circumference though these were noted to be normal. She presented to medical attention at age 2 with seizures typically involving loss of neck tone and consciousness. The frequency of the seizures increased over the next several years. On neurologic exam in 1999 at age 3, she had diminished visual acuity, mildly impaired abduction of the right eye, and delayed psychomotor development. Electroencephalogram (EEG) monitoring test revealed generalized slow spike waves, thought to be consistent with atypical absence seizures, which accompanied the forward drop of the head. Her seizures were ultimately controlled with valproic acid. During her last clinical visit within the past year, she was unable to read. She weighed 32 kg (10-25<sup>th</sup> percentile), was 1.43 m tall (25-50<sup>th</sup> percentile), and her head circumference was 50 cm (near 50<sup>th</sup> percentile). Her pre-existing strabismus had resolved, and musculoskeletal examination was within normal limits.

**NG 367-1**

The patient is a 33 year-old right-handed female who is the product of a first cousin consanguineous union. With the exception of a fall from approximately 2 meters at the age of 2.5, she had an uneventful neonatal and perinatal period, and reached mental and motor milestones on time. At the age of 10, she began experiencing seizures which consisted mostly of staring and blinking spells. At 14, she apparently experienced seizures during which she complained of an inability to see, though she later had no recollection of these episodes. The patient developed generalized tonic clonic (GTC) seizures at age 18. At age 21, she underwent a five-day inpatient scalp EEG monitoring during which she experienced four complex partial seizures with automatisms and forced blinking which localized to the bilateral posterior temporal/parieto-occipital lobes. Her epilepsy has been refractory to multiple trials of anti-epileptic medication but was finally controlled on a combination therapy that consisted of valproic acid, pregabalin, and topiramate. The longest seizure-free interval to date was four months. On her most recent medical visit, she was employed as an administrative assistant at a governmental office following her graduation from high school. On her neurological exam, her extraocular movements and vision were intact, and there was no nystagmus. The motor exam was grossly intact with normal strength and tone. No further work-up for muscular problems, which are associated with mutations in other laminin molecules, was performed. The rest of the neurological exam was unremarkable.

**NG 50-1**

The patient is a 16 year-old girl born to consanguineous parents. She weighed 2.75 kg at birth (10<sup>th</sup> percentile), height and head circumference were normal per report though these measurements are currently unavailable. She presented to medical attention at age 11. Her seizures, which were accompanied by autonomic symptoms, started at age 10. During video EEG monitoring, right parieto-occipital ictal activity was recorded and the patient experienced visual loss with head and eyes deviating

to the left side. During her last clinical visit this past year, she had normal ophthalmologic and musculoskeletal examinations. At this time, she weighed 41 kg (<3<sup>rd</sup> percentile), was 1.55 m tall (10<sup>th</sup> percentile), and her head circumference was 53 cm (50<sup>th</sup> percentile). The remainder of her physical examination was unremarkable.

## Supplementary Videos

**Supplementary Videos 1 and 2.** Movies constructed from T2 axial (Video 1) and sagittal (Video 2) images (photographically inverted) of patient NG 49-1 demonstrate bilateral occipital pachgyria. The gray-white junction is ill-defined and there is thickening of both occipital cortices which appear smooth with loss of cerebral convolutions. Polymicrogyria is seen at the junction of the occipital and parietal lobes. The rest of the cerebrum, brainstem and cerebellum are grossly normal.

**Supplementary Video 3.** Audiovisual EEG monitoring of NG 367-1 revealed her typical complex partial seizure pattern with automatisms and forced blinking, which localizes to the bilateral posterior temporal/parieto-occipital lobes.

**Supplementary Videos 4 and 5.** Movies constructed from T2 axial (Video 3) and sagittal (Video 4) images of patient NG 367-1 (photographically inverted) shows a picture highly similar to that of NG 49-1 with smoothing and thickening of both occipital lobe cortices. Other cerebral lobes, the brainstem and cerebellum are grossly normal.



## References

1. Song, S.K. et al. Dysmyelination revealed through MRI as increased radial (but unchanged axial) diffusion of water. *Neuroimage* **17**, 1429-36 (2002).
2. Mori, S. & Zhang, J. Principles of diffusion tensor imaging and its applications to basic neuroscience research. *Neuron* **51**, 527-39 (2006).
3. Gersdorff, N., Kohfeldt, E., Sasaki, T., Timpl, R. & Miosge, N. Laminin gamma3 chain binds to nidogen and is located in murine basement membranes. *J Biol Chem* **280**, 22146-53 (2005).
4. Tissir, F. & Goffinet, A.M. Reelin and brain development. *Nat Rev Neurosci* **4**, 496-505 (2003).
5. Frotscher, M. Role for Reelin in stabilizing cortical architecture. *Trends Neurosci* **33**, 407-14.

## Supplementary Tables

**Supplementary Table 1 | Homozygosity Intervals of Individual NG 49-1**

| Chromosome | Start       | End         | SNP Start  | SNP End    | Number of SNPs | Length (cM)* | Length (Mb)* |
|------------|-------------|-------------|------------|------------|----------------|--------------|--------------|
| 1          | 32,046,021  | 37,704,373  | rs8179509  | rs2245872  | 432            | 7.47         | 5.66         |
| 2          | 26,787      | 9,207,642   | rs11900053 | rs1467079  | 1079           | 19.77        | 9.18         |
| 2          | 191,611,003 | 202,543,473 | rs3821236  | rs10201429 | 690            | 8.71         | 10.93        |
| 3          | 9,168,324   | 14,566,350  | rs2675186  | rs9310449  | 624            | 9.68         | 5.40         |
| 8          | 40,291,664  | 43,910,848  | rs2341978  | rs10958798 | 219            | 2.83         | 3.62         |
| 8          | 47,062,007  | 61,889,433  | rs7836486  | rs10092214 | 1127           | 9.77         | 14.83        |
| 8          | 77,932,374  | 103,654,269 | rs2733711  | rs2511748  | 2344           | 21.78        | 25.72        |
| 9          | 12,275,170  | 27,620,562  | rs10283912 | rs12555345 | 2212           | 26.22        | 15.35        |
| 9          | 132,065,770 | 136,718,799 | rs7028995  | rs10776897 | 606            | 12.22        | 4.65         |
| 12         | 2,919,892   | 8,121,428   | rs2302282  | rs7132147  | 685            | 13.40        | 5.20         |
| 13         | 38,931,693  | 73,988,803  | rs737645   | rs1326711  | 3184           | 33.21        | 35.06        |
| 16         | 13,228,839  | 15,949,269  | rs1898685  | rs4148330  | 185            | 3.18         | 2.72         |
| 18         | 6,463,820   | 7,072,526   | rs919093   | rs8088532  | 103            | 2.70         | 0.61         |
| 20         | 48,802,413  | 52,652,385  | rs1054185  | rs1150423  | 480            | 8.58         | 3.85         |
| X          | 2,710,157   | 6,155,942   | rs5939319  | rs2290487  | 227            | 5.61         | 3.45         |
| X          | 22,817,873  | 35,484,817  | rs5970937  | rs5928914  | 1027           | 17.05        | 12.67        |
| X          | 96,813,207  | 109,249,625 | rs5966762  | rs5942890  | 426            | 6.87         | 12.44        |
| Total      |             |             |            |            |                | 209.06       | 171.32       |

\* cM: centiMorgan, Mb: million base pair

**Supplementary Table 2 | Coverage Distributions and Error Rates Across the Whole Exome and Homozygosity Intervals**

| Family ID                          |                                | NG 49-1 | NG 50-1 |
|------------------------------------|--------------------------------|---------|---------|
| Number of lanes                    |                                | 1       | 1       |
| Read Type (Single Read/Paired End) |                                | PE      | SR      |
| Read length                        |                                | 99      | 74      |
| Total number of reads (millions)   |                                | 56.99   | 33.54   |
| % mapped to the genome             |                                | 95.28   | 98.78   |
| Exome                              | % mapped to the exome          | 61.18   | 59.79   |
|                                    | Mean coverage                  | 101.31  | 43.54   |
|                                    | % of bases covered at least 4X | 97.52   | 94.81   |
|                                    | Mean error rate (%)            | 1.09    | 0.28    |
|                                    | 2nd base error rate (%)        | 0.30    | 0.10    |
|                                    | Last base error rate (%)       | 4.70    | 0.82    |
| Exomic Homozygosity Interval       | Interval size (Mbs)            | 1.48    | 2.22    |
|                                    | % mapped to the interval       | 2.93    | 4.15    |
|                                    | Mean coverage                  | 111.21  | 46.34   |
|                                    | % of bases covered at least 4X | 98.70   | 95.91   |
|                                    | Mean error rate (%)            | 0.93    | 0.22    |
|                                    | 2nd base error rate (%)        | 0.26    | 0.10    |
|                                    | Last base error rate (%)       | 4.12    | 0.70    |

**Supplementary Table 3 | Sensitivity and Specificity for the Detection of Variants**

| SNP/Sample                    | NG 49-1                  |                           | NG 50-1       |               |
|-------------------------------|--------------------------|---------------------------|---------------|---------------|
|                               | Sensitivity <sup>+</sup> | Specificity <sup>++</sup> | Sensitivity   | Specificity   |
| # of Het cSNPs by gt and seq* | 1807                     |                           | 1785          |               |
| # of called Het cSNPs by seq  |                          | 1810                      |               | 1790          |
| # of Het cSNPs by genotyping  | 1830                     |                           | 1865          |               |
|                               | <b>98.74%</b>            | <b>99.83%</b>             | <b>95.71%</b> | <b>99.72%</b> |
| # of Hom cSNPs by gt and seq  | 3948                     |                           | 3867          |               |
| # of called Hom cSNPs by seq  |                          | 3962                      |               | 3908          |
| # of Hom cSNPs by genotyping  | 3965                     |                           | 3931          |               |
|                               | <b>99.57%</b>            | <b>99.65%</b>             | <b>98.37%</b> | <b>98.95%</b> |

\* Het: heterozygous, cSNP: coding SNP, gt: genotyping, seq: sequencing, Hom: homozygous

<sup>+</sup> Sensitivity=# of cSNPs by gt and seq / # of cSNPs by genotyping

<sup>++</sup> Specificity= # of cSNPs by gt and seq / # of cSNPs by seq

**Supplementary Table 4 | Novel Variants Identified within the Homozygosity Intervals of NG 49-1**

| Chr | Position    | Base Change  | Quality Score | Coverage | Non-reference Allele Coverage | Reference Allele Coverage | Gene    | Status      | Amino Acid Change | AminoAcid Position | PhyloP |
|-----|-------------|--------------|---------------|----------|-------------------------------|---------------------------|---------|-------------|-------------------|--------------------|--------|
| 9   | 132,901,464 | -TG deletion | 1054          | 34       | 28                            | 1                         | LAMC3   | Frame-shift | C301X             | 301/1575           | -      |
| 9   | 135,331,228 | T to C       | 255           | 114      | 57                            | 0                         | SLC2A6  | Missense    | T172A             | 172/507            | 2.92   |
| 12  | 6,916,693   | G to A       | 48            | 7        | 7                             | 0                         | ATN1    | Missense    | G668R             | 668/1190           | 3.806  |
| 13  | 40,800,942  | G to T       | 132           | 35       | 27                            | 0                         | NARG1L  | Missense    | W258C             | 258/864            | 6.049  |
| 13  | 47,945,498  | A to G       | 117           | 28       | 24                            | 0                         | RB1     | Missense    | I831V             | 831/928            | 4.633  |
| 13  | 48,179,415  | G to A       | 255           | 140      | 63                            | 0                         | CYSLTR2 | Missense    | S154N             | 154/346            | 0.589  |
| 18  | 6,955,341   | G to A       | 255           | 109      | 57                            | 0                         | LAMA1   | Missense    | R2381C            | 2381/3075          | 3.932  |
| X   | 2,846,140   | G to A       | 255           | 83       | 83                            | 0                         | ARSD    | Missense    | P190S             | 190/382            | 0.312  |
| X   | 99,772,486  | G to A       | 255           | 191      | 191                           | 0                         | TSPAN6  | Missense    | R235C             | 235/245            | 2.093  |

**Supplementary Table 5 | Homozygosity Intervals of Individual NG 50-1**

| Chromosome | Start       | End         | SNP Start  | SNP End    | Number of SNPs | Length (cM)* | Length (Mb)* |
|------------|-------------|-------------|------------|------------|----------------|--------------|--------------|
| 1          | 22,974,275  | 30,319,584  | rs1561624  | rs267667   | 559            | 7.60         | 7.35         |
| 2          | 37,949,126  | 46,343,636  | rs2707237  | rs2881321  | 917            | 10.55        | 8.39         |
| 2          | 174,634,997 | 204,770,878 | rs1545361  | rs6714929  | 2088           | 21.19        | 30.14        |
| 4          | 26,073,744  | 37,489,701  | rs2788853  | rs2995941  | 960            | 12.38        | 11.42        |
| 4          | 52,378,364  | 57,351,820  | rs1910739  | rs7681381  | 370            | 6.32         | 4.97         |
| 5          | 70,715,382  | 74,015,867  | rs13168712 | rs820870   | 334            | 5.09         | 3.30         |
| 6          | 16,744,783  | 22,919,946  | rs909787   | rs12211715 | 763            | 9.02         | 6.18         |
| 6          | 34,210,039  | 39,329,781  | rs2499730  | rs1744416  | 532            | 5.37         | 5.12         |
| 7          | 40,833,188  | 53,622,267  | rs17688601 | rs10488484 | 1251           | 14.97        | 12.79        |
| 10         | 90,977,544  | 95,352,040  | rs2071510  | rs3758538  | 399            | 4.64         | 4.37         |
| 10         | 97,974,301  | 116,262,976 | rs1007764  | rs2475233  | 1590           | 18.23        | 18.29        |
| 11         | 21,562,329  | 36,843,465  | rs1945569  | rs7107782  | 1282           | 17.41        | 15.28        |
| 13         | 45,249,732  | 57,720,052  | rs3803195  | rs4627212  | 997            | 9.56         | 12.47        |
| 13         | 96,346,535  | 101,270,253 | rs7986491  | rs10508076 | 572            | 7.57         | 4.92         |
| 15         | 66,712,579  | 75,771,535  | rs8030733  | rs4243047  | 583            | 7.96         | 9.06         |
| 20         | 49,707,586  | 51,400,261  | rs2235858  | rs6013667  | 200            | 3.26         | 1.69         |
| X          | 9,763,544   | 23,701,445  | rs2405940  | rs5970795  | 1026           | 23.09        | 13.94        |
| X          | 34,940,975  | 37,076,352  | rs3124850  | rs5917959  | 63             | 3.35         | 2.14         |
| X          | 105,380,575 | 144,753,774 | rs379742   | rs6626452  | 2029           | 58.27        | 39.37        |
| Total      |             |             |            |            |                | 245.83       | 211.19       |

\* cM: centiMorgan, Mb: million base pair

**Supplementary Table 6 | Novel Homozygous Variants Identified within the Homozygosity Intervals of NG 50-1**

| Chr | Position    | Base Change | Quality Score | Coverage | Non-reference Allele Coverage | Reference Allele Coverage | Gene    | Status   | Amino Acid Change | Amino Acid Position | PhyloP |
|-----|-------------|-------------|---------------|----------|-------------------------------|---------------------------|---------|----------|-------------------|---------------------|--------|
| 2   | 179,346,119 | G to A      | 63            | 12       | 9                             | 0                         | TTN     | Missense | A2560V            | 2560/33423          | 5.118  |
| 6   | 20,591,060  | A to G      | 255           | 82       | 45                            | 0                         | E2F3    | Missense | K272E             | 272/465             | 1.435  |
| 6   | 34,616,805  | G to C      | 84            | 15       | 13                            | 0                         | SPDEF   | Missense | Q190E             | 190/335             | 3.451  |
| 15  | 73,441,049  | G to C      | 51            | 8        | 7                             | 0                         | MAN2C1  | Missense | I389M             | 389/1040            | 4.397  |
| X   | 12,849,410  | C to A      | 244           | 73       | 39                            | 1                         | TLR8    | Missense | T777N             | 777/1041            | 1.155  |
| X   | 19,465,763  | C to T      | 150           | 37       | 25                            | 0                         | SH3KBP1 | Missense | R613Q             | 613/628             | 2.305  |
| X   | 135,590,575 | G to A      | 255           | 146      | 62                            | 0                         | ARHGEF6 | Missense | S562L             | 562/776             | 1.832  |
| X   | 140,821,656 | C to T      | 69            | 14       | 11                            | 0                         | MAGEC1  | Missense | S267F             | 267/1142            | -1.143 |

**Supplementary Table 7a | Top 150 genes with expression profiles that correlate with *LAMC3***

| Rank | symbol              | refseq    | Cor to <i>LAMC3</i> | Rank | symbol          | refseq       | Cor to <i>LAMC3</i> |
|------|---------------------|-----------|---------------------|------|-----------------|--------------|---------------------|
| 1    | <b><i>LAMC3</i></b> | NM_006059 | 100.00%             | 41   | <i>CYP1B1</i>   | NM_000104    | 45.26%              |
| 2    | <i>COL6A3</i>       | NM_004369 | 56.58%              | 42   | <i>EMCN</i>     | NM_016242    | 45.17%              |
| 3    | <i>COL18A1</i>      | NM_130444 | 56.22%              | 43   | <i>ENG</i>      | NM_000118    | 45.12%              |
| 4    | <i>IGF2</i>         | NM_000612 | 56.17%              | 44   | <i>C7</i>       | NM_000587    | 44.92%              |
| 5    | <i>IGF2</i>         | NM_000612 | 55.30%              | 45   | <i>LUM</i>      | NM_002345    | 44.65%              |
| 6    | <i>CXCL12</i>       | NM_000609 | 54.80%              | 46   | <i>TGFBI</i>    | NM_000358    | 44.56%              |
| 7    | <i>KANK2</i>        | NM_015493 | 53.52%              | 47   | <i>ASPN</i>     | NM_017680    | 44.47%              |
| 8    | <i>XPNPEP2</i>      | NM_003399 | 52.98%              | 48   | <i>ERG</i>      | NM_001136154 | 44.43%              |
| 9    | <i>COL6A2</i>       | NM_001849 | 52.40%              | 49   | <i>PDE4C</i>    | NM_000923    | 44.39%              |
| 10   | <i>COL3A1</i>       | NM_000090 | 51.66%              | 50   | <i>MXRA5</i>    | NM_015419    | 44.38%              |
| 11   | <i>COL15A1</i>      | NM_001855 | 51.46%              | 51   | <i>FGD5</i>     | NM_152536    | 44.32%              |
| 12   | <i>COL1A1</i>       | NM_000088 | 50.68%              | 52   | <i>ALPK3</i>    | NM_020778    | 44.25%              |
| 13   | <i>CD248</i>        | NM_020404 | 50.57%              | 53   | <i>FN1</i>      | NM_212482    | 44.16%              |
| 14   | <i>ITIH2</i>        | NM_002216 | 50.38%              | 54   | <i>CPZ</i>      | NM_001014448 | 44.08%              |
| 15   | <i>CCND1</i>        | NM_053056 | 50.22%              | 55   | <i>CRYAA</i>    | NM_000394    | 43.91%              |
| 16   | <i>DOCK6</i>        | NM_020812 | 49.50%              | 56   | <i>FGF8</i>     | NM_033163    | 43.79%              |
| 17   | <i>FLI1</i>         | NM_002017 | 49.47%              | 57   | <i>RHBDF1</i>   | NM_022450    | 43.69%              |
| 18   | <i>SRPX2</i>        | NM_014467 | 48.15%              | 58   | <i>IGFBP4</i>   | NM_001552    | 43.59%              |
| 19   | <i>COL1A2</i>       | NM_000089 | 47.56%              | 59   | <i>MPZL2</i>    | NM_144765    | 43.51%              |
| 20   | <i>ANPEP</i>        | NM_001150 | 47.52%              | 60   | <i>ARHGEF15</i> | NM_173728    | 43.42%              |
| 21   | <i>GATA6</i>        | NM_005257 | 47.44%              | 61   | <i>OGN</i>      | NM_033014    | 43.32%              |
| 22   | <i>CETP</i>         | NM_000078 | 47.01%              | 62   | <i>CYSLTR1</i>  | NM_006639    | 43.30%              |
| 23   | <i>EDN3</i>         | NM_207032 | 46.94%              | 63   | <i>COLEC12</i>  | NM_130386    | 43.11%              |
| 24   | <i>CD28</i>         | NM_006139 | 46.83%              | 64   | <i>ST14</i>     | NM_021978    | 43.01%              |
| 25   | <i>ALDH1A2</i>      | NM_003888 | 46.73%              | 65   | <i>SLC6A2</i>   | NM_001043    | 42.95%              |
| 26   | <i>LYVE1</i>        | NM_006691 | 46.62%              | 66   | <i>TJP3</i>     | NM_014428    | 42.80%              |
| 27   | <i>MMRN2</i>        | NM_024756 | 46.55%              | 67   | <i>BARX2</i>    | NM_003658    | 42.72%              |
| 28   | <i>ATP2A1</i>       | NM_004320 | 46.51%              | 68   | <i>DAB2</i>     | NM_001343    | 42.61%              |
| 29   | <i>DSP</i>          | NM_004415 | 46.39%              | 69   | <i>ITGA5</i>    | NM_002205    | 42.58%              |
| 30   | <i>SIGLEC1</i>      | NM_023068 | 46.06%              | 70   | <i>FAM83C</i>   | NM_178468    | 42.39%              |
| 31   | <i>CDH5</i>         | NM_001795 | 46.06%              | 71   | <i>ATP8B3</i>   | NM_138813    | 42.38%              |
| 32   | <i>CD209</i>        | NR_026692 | 45.87%              | 72   | <i>STARD8</i>   | NM_001142503 | 42.35%              |
| 33   | <i>BGN</i>          | NM_001711 | 45.67%              | 73   | <i>HOXB3</i>    | NM_002146    | 42.35%              |
| 34   | <i>LSR</i>          | NM_205834 | 45.52%              | 74   | <i>PCOLCE</i>   | NM_002593    | 42.20%              |
| 35   | <i>ADCY4</i>        | NM_139247 | 45.52%              | 75   | <i>MALL</i>     | NM_005434    | 42.02%              |
| 36   | <i>OLFML2A</i>      | NM_182487 | 45.50%              | 76   | <i>ELN</i>      | NM_000501    | 42.00%              |
| 37   | <i>FMOD</i>         | NM_002023 | 45.45%              | 77   | <i>ETS1</i>     | NM_001143820 | 41.98%              |
| 38   | <i>NID2</i>         | NM_007361 | 45.40%              | 78   | <i>GJA5</i>     | NM_005266    | 41.97%              |
| 39   | <i>STAB1</i>        | NM_015136 | 45.36%              | 79   | <i>WFIKK2</i>   | NM_175575    | 41.96%              |
| 40   | <i>SLC6A20</i>      | NM_020208 | 45.32%              | 80   | <i>FAM83E</i>   | NM_017708    | 41.87%              |



| Rank | symbol          | refseq       | Cor to LAMC3 | Rank | symbol           | refseq       | Cor to LAMC3 |
|------|-----------------|--------------|--------------|------|------------------|--------------|--------------|
| 81   | <i>PRND</i>     | NM_012409    | 41.81%       | 116  | <i>SLC22A8</i>   | NM_004254    | 39.78%       |
| 82   | <i>EFCAB4B</i>  | NM_001144958 | 41.64%       | 117  | <i>LAMA2</i>     | NM_000426    | 39.71%       |
| 83   | <i>AOC3</i>     | NM_003734    | 41.40%       | 118  | <i>VASN</i>      | NM_138440    | 39.61%       |
| 84   | <i>HRC</i>      | NM_002152    | 41.35%       | 119  | <i>LOXL2</i>     | NM_002318    | 39.60%       |
| 85   | <i>C21orf93</i> | AF427488     | 41.33%       | 120  | <i>KLF4</i>      | NM_004235    | 39.58%       |
| 86   | <i>FAM83F</i>   | NM_138435    | 41.30%       | 121  | <i>AMHR2</i>     | NM_020547    | 39.51%       |
| 87   | <i>PLAU</i>     | NM_002658    | 41.22%       | 122  | <i>ITGA11</i>    | NM_001004439 | 39.50%       |
| 88   | <i>PRM3</i>     | NM_021247    | 41.21%       | 123  | <i>BNC2</i>      | NM_017637    | 39.49%       |
| 89   | <i>ACTG2</i>    | NM_001615    | 41.15%       | 124  | <i>CD7</i>       | NM_006137    | 39.42%       |
| 90   | <i>ABCC3</i>    | NM_003786    | 41.14%       | 125  | <i>SCGB1A1</i>   | NM_003357    | 39.33%       |
| 91   | <i>NPR1</i>     | NM_000906    | 40.95%       | 126  | <i>STRA6</i>     | NM_022369    | 39.32%       |
| 92   | <i>MIOX</i>     | NM_017584    | 40.94%       | 127  | <i>ACR</i>       | NM_001097    | 39.24%       |
| 93   | <i>OTOP3</i>    | NM_178233    | 40.92%       | 128  | <i>WNK4</i>      | NM_032387    | 39.13%       |
| 94   | <i>BMP6</i>     | NM_001718    | 40.91%       | 129  | <i>CLEC1A</i>    | NM_016511    | 39.13%       |
| 95   | <i>PSTPIP1</i>  | NM_003978    | 40.90%       | 130  | <i>C20orf144</i> | DQ080434     | 39.12%       |
| 96   | <i>BMP5</i>     | NM_021073    | 40.89%       | 131  | <i>CTGF</i>      | NM_001901    | 39.12%       |
| 97   | <i>NMUR2</i>    | NM_020167    | 40.89%       | 132  | <i>NID1</i>      | NM_002508    | 39.06%       |
| 98   | <i>KANK3</i>    | NM_198471    | 40.83%       | 133  | <i>HIC1</i>      | NM_001098202 | 39.06%       |
| 99   | <i>PLEKHA4</i>  | NM_020904    | 40.81%       | 134  | <i>AEN</i>       | NM_022767    | 39.03%       |
| 100  | <i>OR51E1</i>   | NM_152430    | 40.58%       | 135  | <i>CYP1A2</i>    | NM_000761    | 39.01%       |
| 101  | <i>RBP5</i>     | NM_031491    | 40.49%       | 136  | <i>OLFML1</i>    | NM_198474    | 38.98%       |
| 102  | <i>CTSL2</i>    | NM_001333    | 40.47%       | 137  | <i>ZNF761</i>    | NM_001008401 | 38.98%       |
| 103  | <i>P2RX1</i>    | NM_002558    | 40.46%       | 138  | <i>GPR124</i>    | NM_032777    | 38.95%       |
| 104  | <i>ADAMTS12</i> | NM_030955    | 40.42%       | 139  | <i>CREB3L1</i>   | NM_052854    | 38.95%       |
| 105  | <i>COL20A1</i>  | NM_020882    | 40.33%       | 140  | <i>MYLK2</i>     | NM_033118    | 38.94%       |
| 106  | <i>MYO18B</i>   | NM_032608    | 40.17%       | 141  | <i>APOA5</i>     | NM_052968    | 38.87%       |
| 107  | <i>ESRP2</i>    | NM_024939    | 40.15%       | 142  | <i>OR10G4</i>    | NM_001004462 | 38.84%       |
| 108  | <i>TMC4</i>     | NM_001145303 | 40.09%       | 143  | <i>C21orf125</i> | NR_026960    | 38.82%       |
| 109  | <i>KRTAP5-3</i> | NM_001012708 | 40.08%       | 144  | <i>GPR97</i>     | NM_170776    | 38.81%       |
| 110  | <i>PLVAP</i>    | NM_031310    | 40.06%       | 145  | <i>DSG3</i>      | NM_001944    | 38.75%       |
| 111  | <i>HOXC8</i>    | NM_022658    | 40.04%       | 146  | <i>KRT38</i>     | NM_006771    | 38.72%       |
| 112  | <i>SLC6A13</i>  | NM_016615    | 39.99%       | 147  | <i>OLFML2B</i>   | NM_015441    | 38.71%       |
| 113  | <i>KDELRL3</i>  | NM_006855    | 39.89%       | 148  | <i>UPK1A</i>     | NM_007000    | 38.69%       |
| 114  | <i>CALCA</i>    | NM_001741    | 39.83%       | 149  | <i>DRD4</i>      | NM_000797    | 38.69%       |
| 115  | <i>MYH6</i>     | NM_002471    | 39.83%       | 150  | <i>MYBPC2</i>    | NM_004533    | 38.67%       |

**Supplementary Table 7b | GO Pathway genes with expression profiles that correlate with *LAMC3* (analysis based on top 50 genes)**

---

**GO:0031012~extracellular matrix (False discovery rate (FDR) =  $4.0 \times 10^{-10}$ )**

*COL18A1, ASPN, FMOD, CD248, LUM, COL3A1, COL15A1, OLFML2A, NID2, MMRN2, BGN, TGFBI, COL6A3, COL1A2, COL6A2, COL1A1*

**GO:0044421~extracellular region part (FDR =  $1.7 \times 10^{-9}$ )**

*COL18A1, ASPN, FMOD, EDN3, LUM, CD248, COL3A1, COL15A1, OLFML2A, IGF2, NID2, LSR, CXCL12, MMRN2, BGN, TGFBI, COL6A3, COL1A2, COL6A2, CETP, COL1A1, ENG*

**GO:0005576~extracellular region (FDR =  $2.6 \times 10^{-9}$ )**

*ASPN, FMOD, C7, EDN3, EMCN, CD248, LUM, COL3A1, LSR, CXCL12, MMRN2, TGFBI, COL6A3, COL6A2, ITIH2, CETP, COL18A1, COL15A1, OLFML2A, IGF2, NID2, MXRA5, SIGLEC1, BGN, SRPX2, CD209, COL1A2, COL1A1, ENG*

**GO:0005578~proteinaceous extracellular matrix (FDR =  $3.1 \times 10^{-9}$ )**

*COL18A1, ASPN, FMOD, CD248, LUM, COL3A1, COL15A1, NID2, MMRN2, BGN, TGFBI, COL6A3, COL1A2, COL6A2, COL1A1*

**GO:0030198~extracellular matrix organization (FDR =  $9.2 \times 10^{-7}$ )**

*COL18A1, LUM, TGFBI, COL3A1, COL1A2, COL6A2, OLFML2A, COL1A1, ENG*

## Supplementary Figures

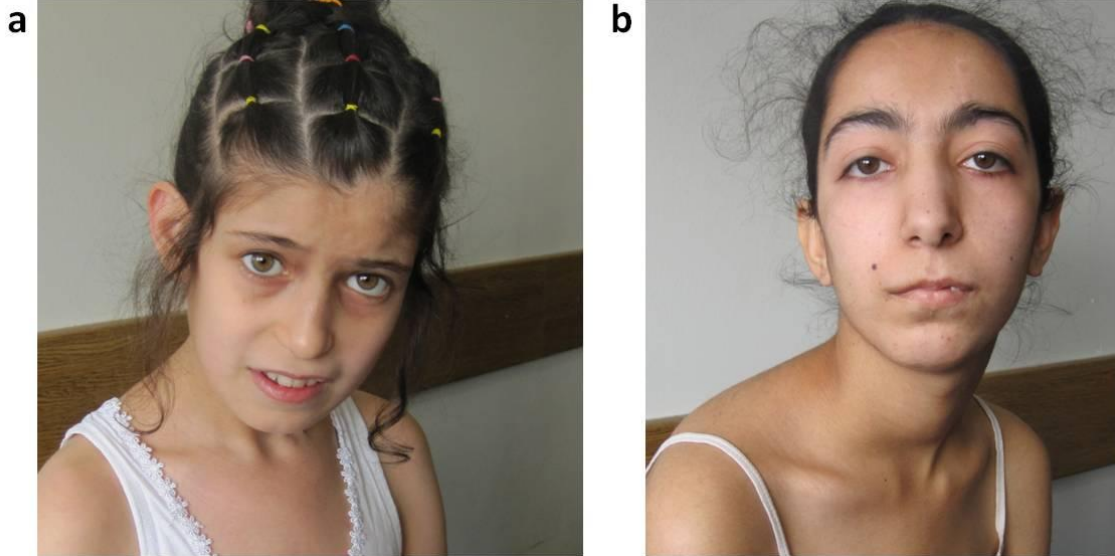

**Supplementary Figure 1 | Clinical images of patients NG 49-1 (a) and NG 50-1 (b).** Pictures of patients are published with written informed consent from their parents.

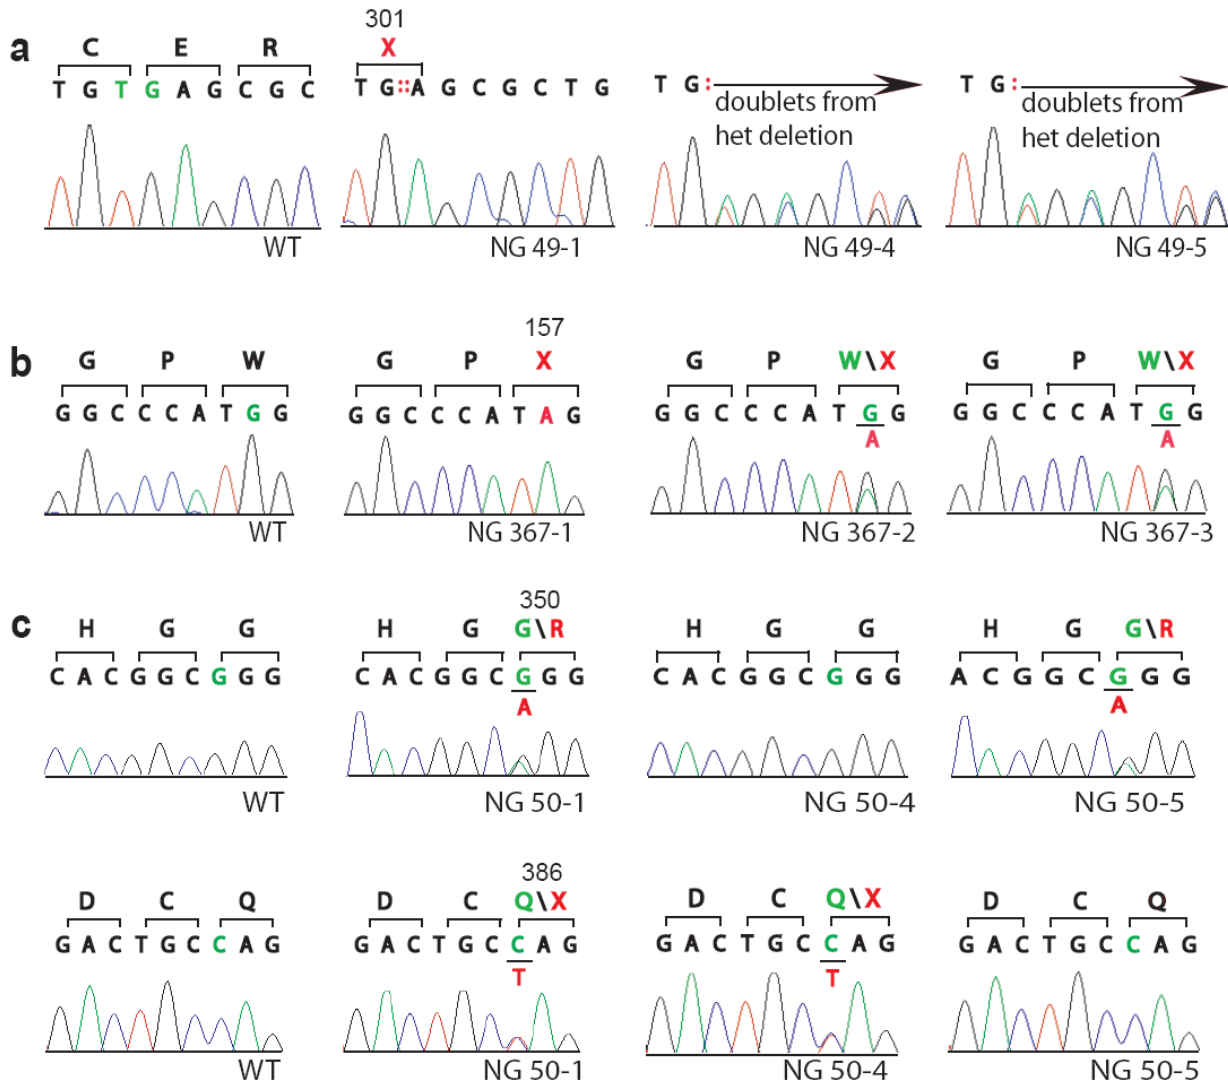

**Supplementary Figure 2 | Sequence traces of wild type along with the three index cases and their parents.**

From left to right, the panels show the sequence traces in a control subject, the patients and the patients' parents, respectively. The predicted amino acids corresponding to each codon are represented above the nucleotide sequences which are marked in bold letters above the chromatograms. For each sequence, the mutated base(s) are shown in red, as are resultant amino acid substitutions. For the wild type sequences, the altered bases are shown in green. Note that all patients are homozygous for the mutations whereas both parents are heterozygous. The following mutations are observed: (a) NG 49-1: p.Cys301X, (b) NG 367-1: p.Trp157X, (c) NG 50-1: p.Gly350Arg, p.Gln386X; NG 50-5: p.Gly350Arg and NG 50-4: p.Gln386X.

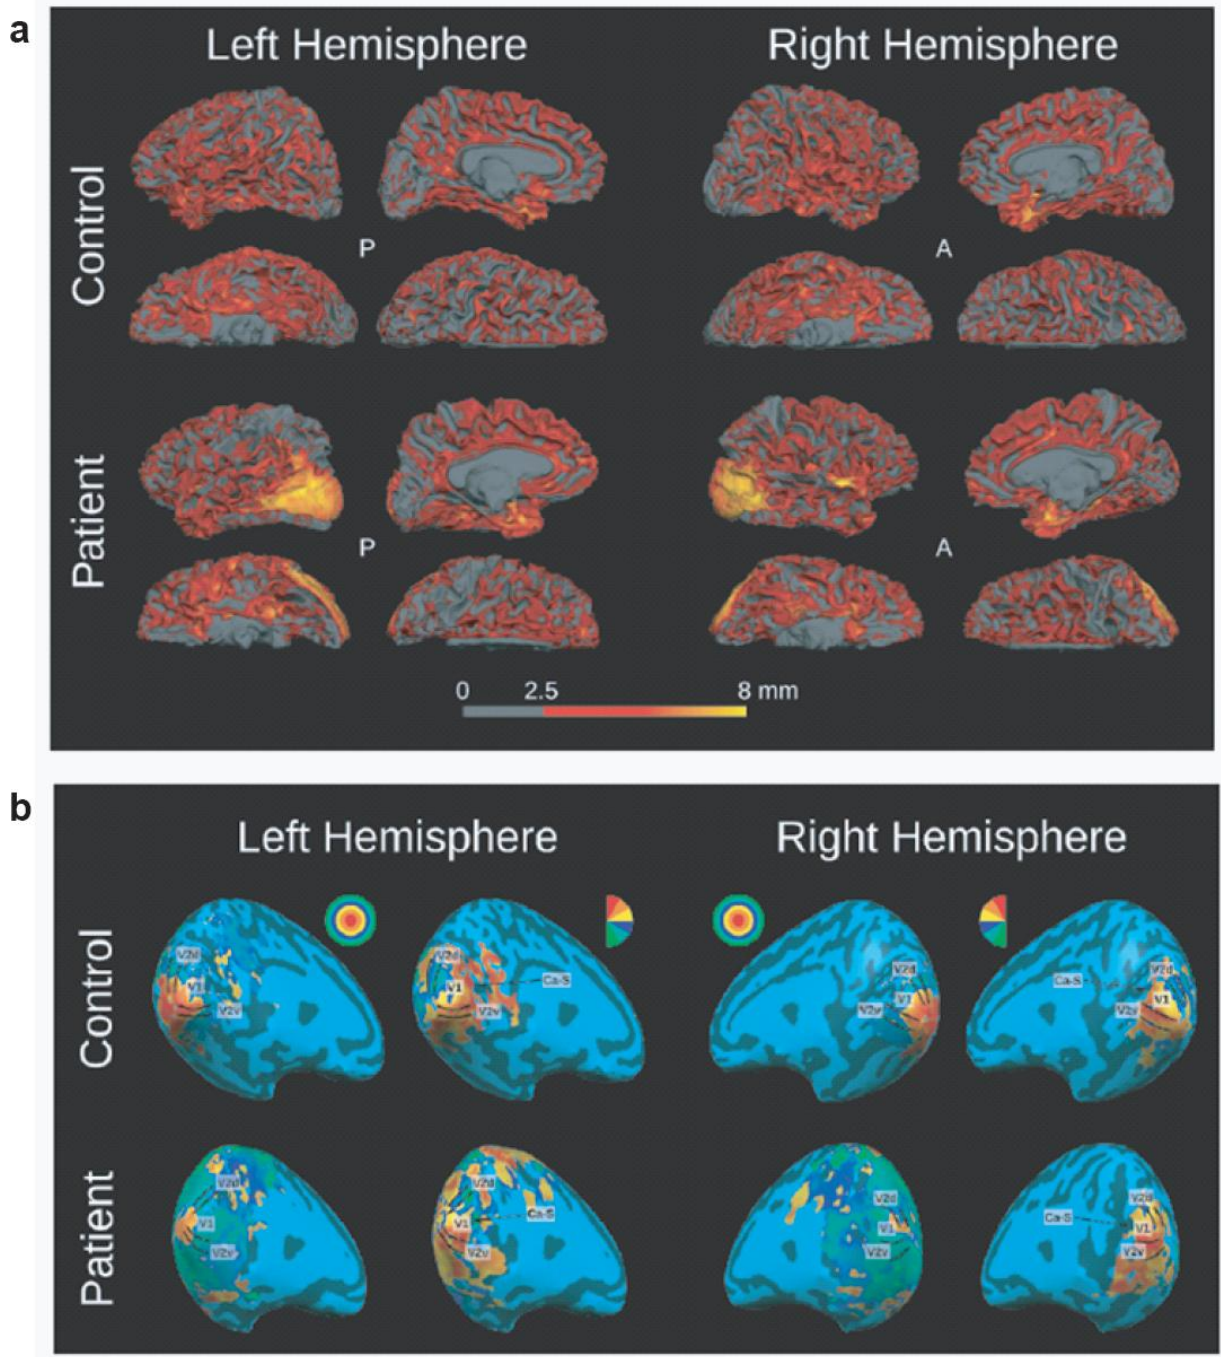

**Supplementary Figure 3 | Functional MRI studies** (a) Three dimensional reformatting of MR images shows the lateral occipital cortex to be significantly thickened in NG 367-1 as compared to a control subject in which the cortex is normal in thickness. A bar representing the color coding for the cortical thickness is shown.

A:anterior, P: posterior.

(b) The retinotopic mapping in subject NG 367-1 reveals that the anatomical locations of the primary visual areas and the spatial patterns of their activity in response to visual stimulation in NG 367-1 are similar to control subjects. The stimuli presented are shown on top.

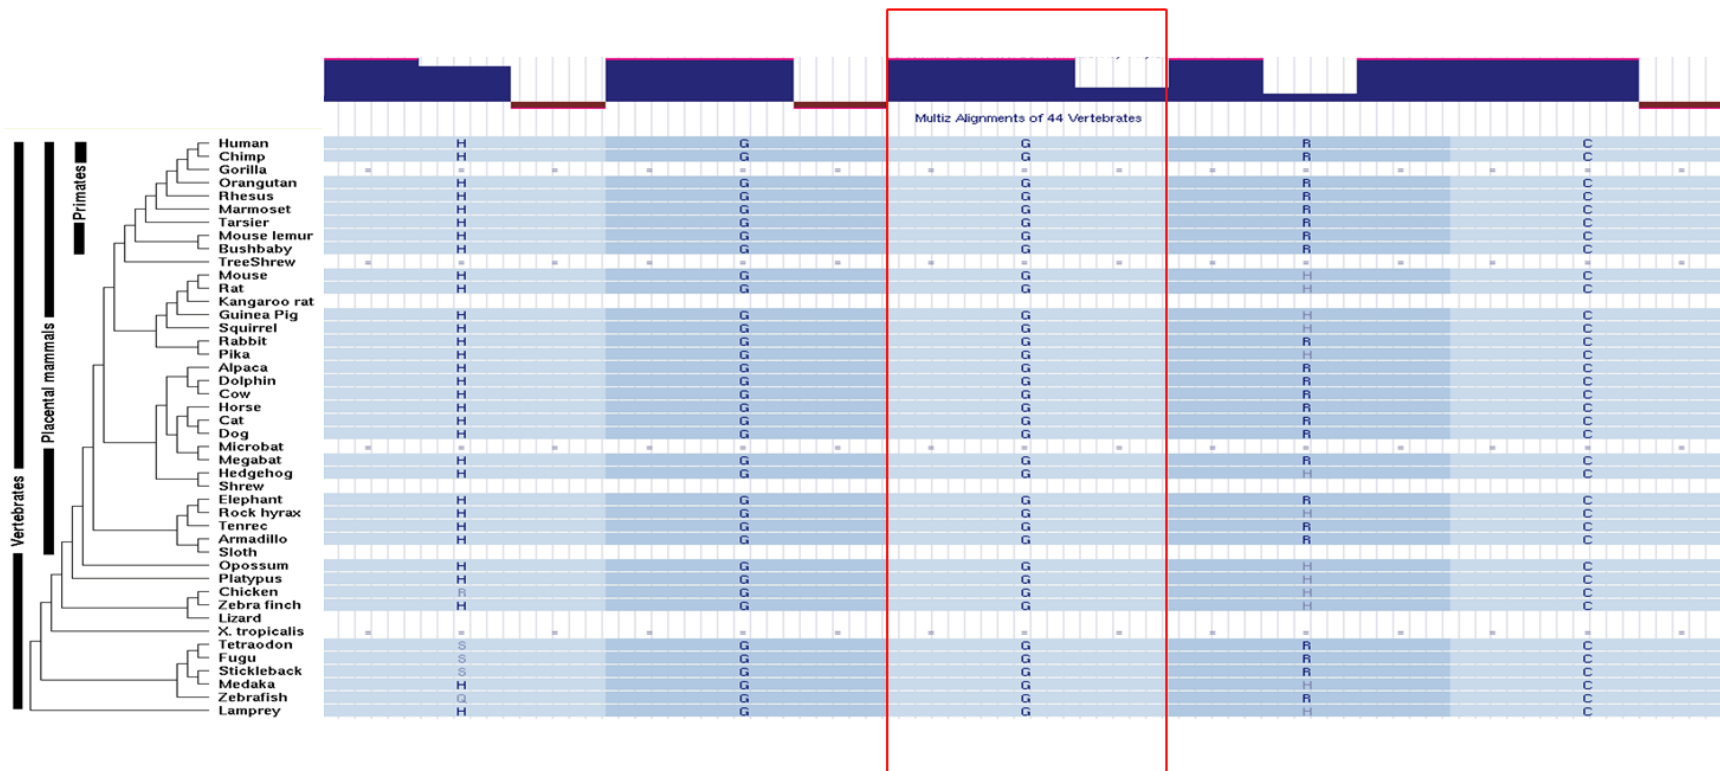

**Supplementary Figure 4 | p.Gly350Arg mutation in individual NG 50-1.** The glycine residue is completely conserved across 44 species, suggesting that the p.Gly350Arg mutation is likely to be damaging.



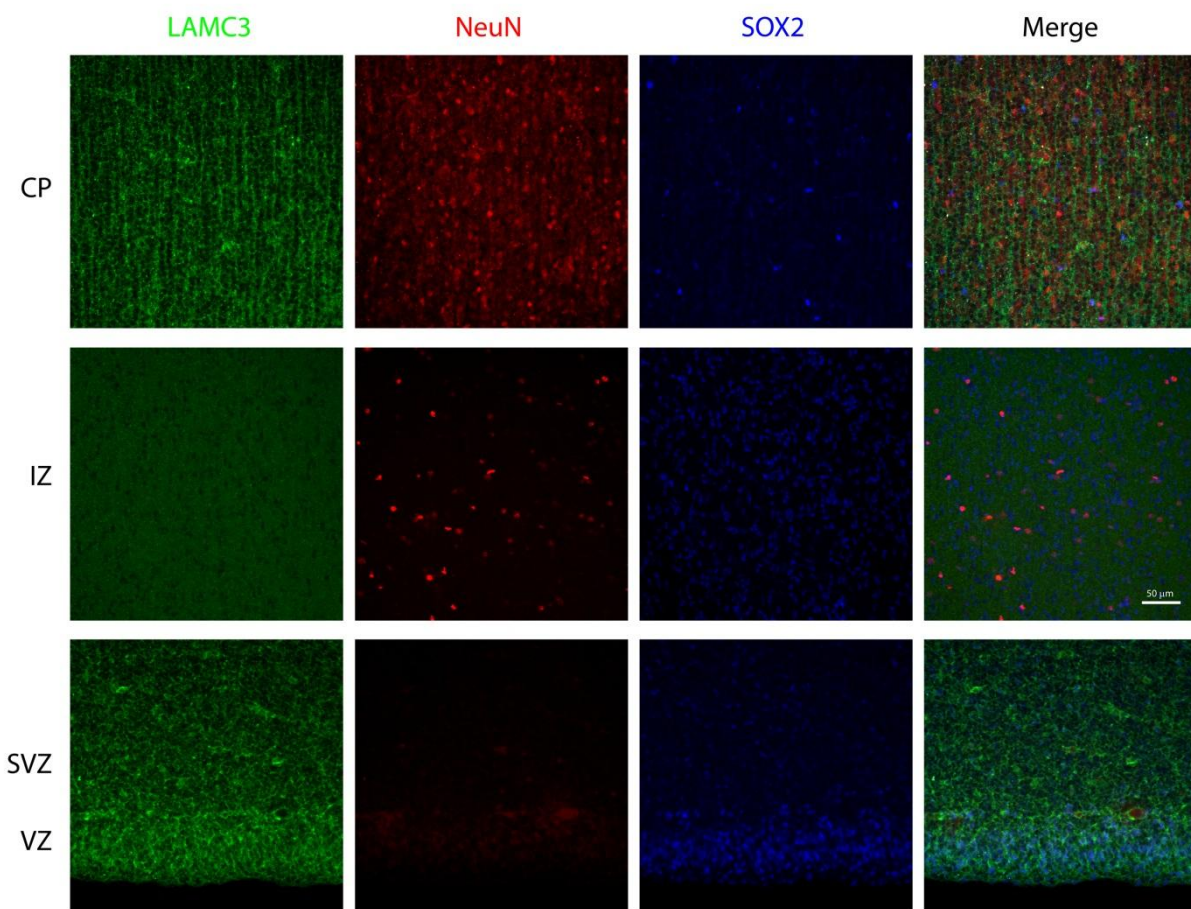

**Supplementary Figure 5 | LAMC3 is expressed in the cortical plate and the germinal zones of the fetal human neocortical wall.** Human fetal neocortex at 20 post-conceptual weeks was immunostained for LAMC3 (green), the post-mitotic neuronal marker NeuN (red), and the neural stem cell marker SOX2 (blue). LAMC3 is strongly expressed in post-mitotic NeuN-positive neurons that have migrated and settled in the cortical plate (CP). LAMC3 is not expressed in the intermediate zone (IZ), which contains migrating neurons. LAMC3 is expressed in SOX2-positive neural stem cells in the ventricular zone (VZ) and subventricular zone (SVZ). In addition, LAMC3 is expressed in the basal lamina of blood vessels.

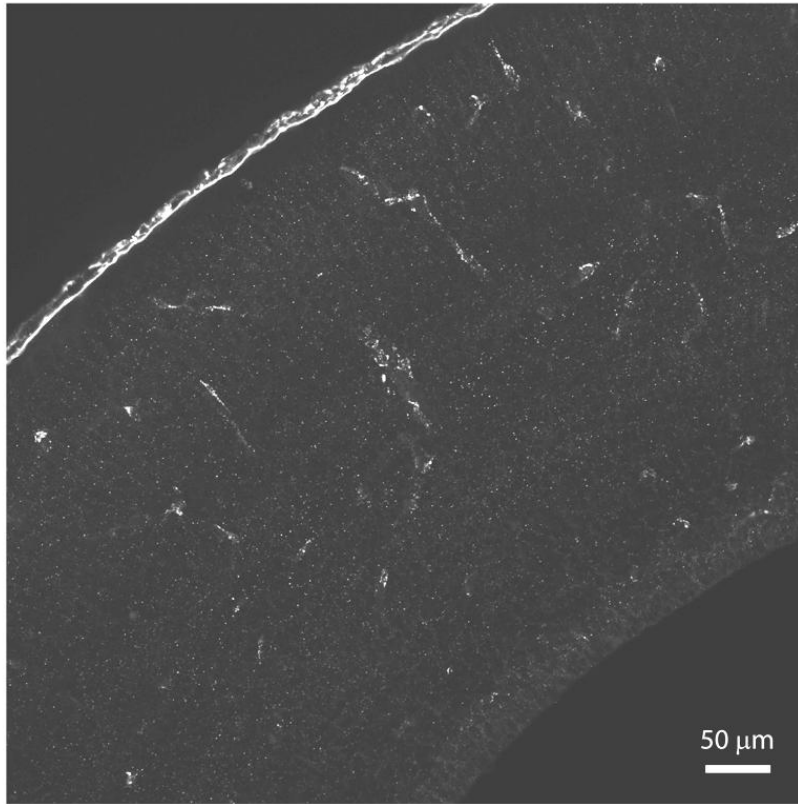

**Supplementary Figure 6 | LAMC3 is absent from neural progenitors and neurons in the embryonic day 17.5 mouse cortical wall.** Mouse neocortex at embryonic day (E) 17.5 was immunostained for LAMC3. LAMC3 was present in the basal lamina of blood vessels and meninges but absent from the cortical germinal zones, which contain neural progenitors, and the cortical plate, which contain post-mitotic neurons.



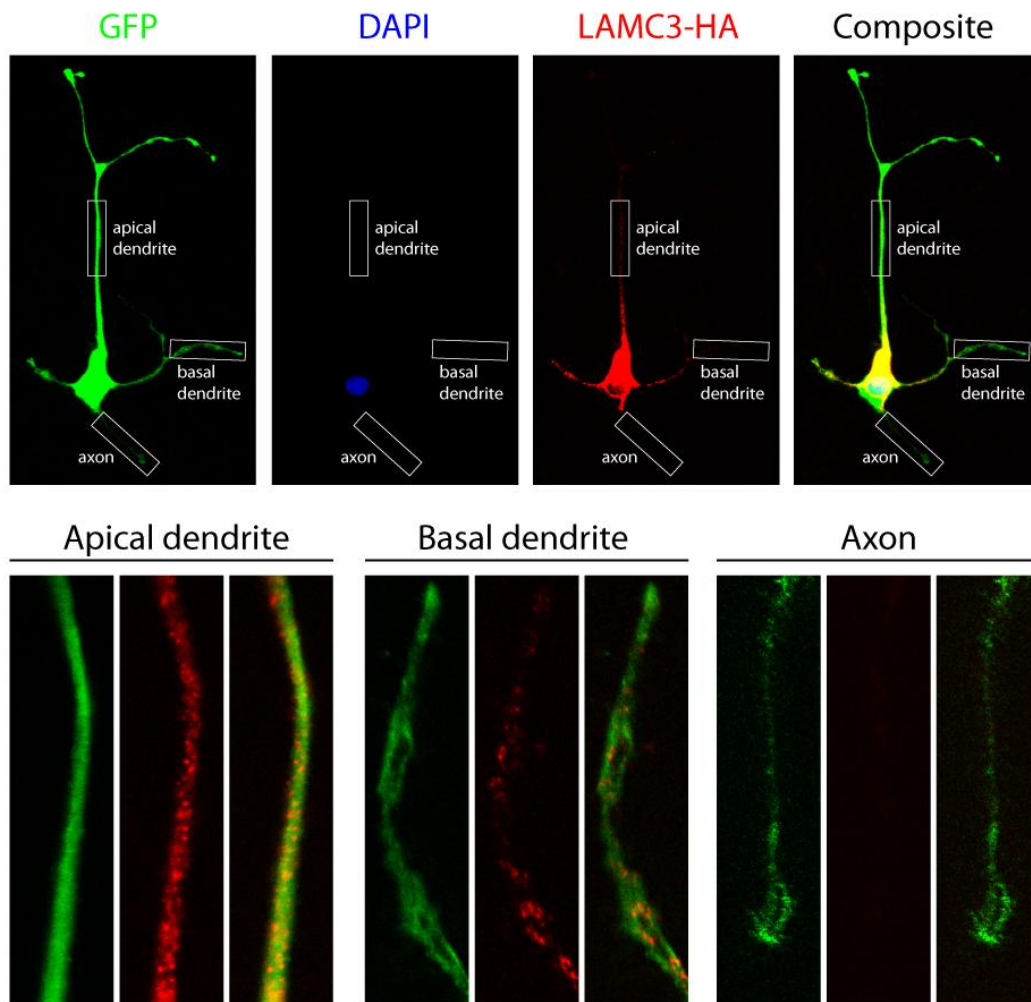

**Supplementary Figure 7 | LAMC3 localizes primarily to the somatodendritic compartment in cultured fetal human primary neuronal cells.** Neural progenitor cells were isolated from fetal human neocortex at 17 post-conceptual weeks and expanded *in vitro* in the presence of growth factors. After 4 weeks in culture, progenitor cells were transfected with a construct that co-expresses GFP and HA-tagged human LAMC3 using nucleofection. One day after transfection, growth factors were withdrawn to facilitate neuronal differentiation. Neurons were fixed 7 days after growth factor withdrawal and stained for GFP and HA. Tagged human LAMC3 predominantly localizes to the soma, both the apical and basal dendrites, but is mostly absent from the axon. These results are consistent with our immunolocalization of LAMC3 in the intact human fetal neocortex.

## Synaptogenesis-V1C

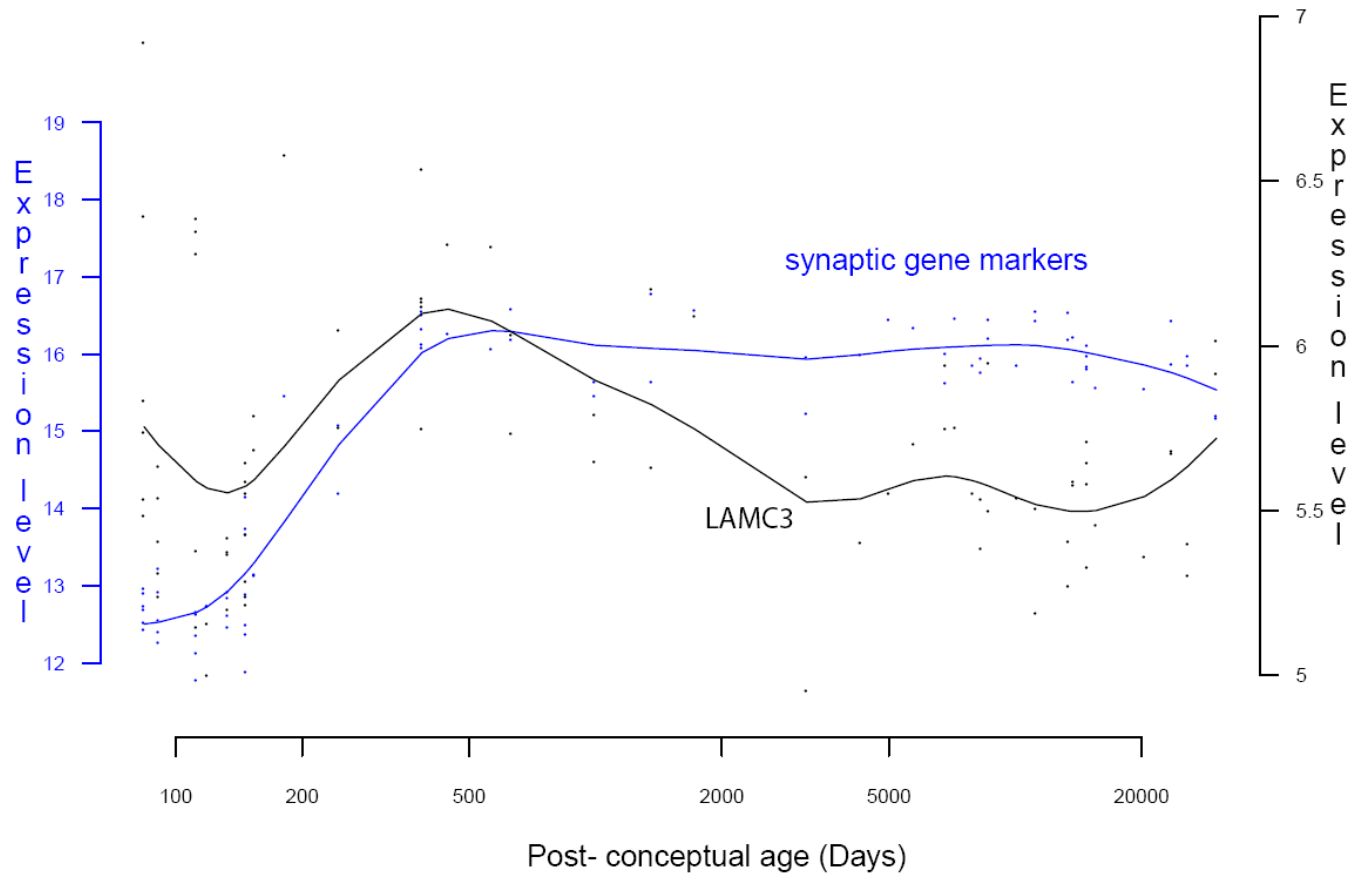

**Supplementary Figure 8 | *LAMC3* expression (black line) parallels that of genes that mark synaptogenesis (*SYP*, *SYPL1*, *SYPL2*, *SYN1*, blue line) within the V1 visual cortex (V1C) during a period between late gestation to late infancy.** log 2 of the first principle component (PC1), which accounts for the majority of variability of the expression data (see **Methods**), was plotted against age to represent the developmental trajectory. log2 of *LAMC3* expression is shown on the right vertical axis.

The NIHMS has received the file 'ng.836-S2.mov' as supplementary data. The file will not appear in this PDF Receipt, but it will be linked to the web version of your manuscript.

The NIHMS has received the file 'ng.836-S3.mov' as supplementary data. The file will not appear in this PDF Receipt, but it will be linked to the web version of your manuscript.

The NIHMS has received the file 'ng.836-S4.mov' as supplementary data. The file will not appear in this PDF Receipt, but it will be linked to the web version of your manuscript.

The NIHMS has received the file 'ng.836-S5.mov' as supplementary data. The file will not appear in this PDF Receipt, but it will be linked to the web version of your manuscript.

The NIHMS has received the file 'ng.836-S6.mov' as supplementary data. The file will not appear in this PDF Receipt, but it will be linked to the web version of your manuscript.
